# Supplementary material
Source: MDPI journal article supplement (https://www.mdpi.com/2306-5338/8/4/185)
Supplement: s1 [file s1]

Table S1: “Data of the paired ecological and hydrological monitoring sites”.

| ECO    |   | LIMec | STARICMi-    |        |             |      |       |      |      |      |      | H1-  |
|--------|---|-------|--------------|--------|-------------|------|-------|------|------|------|------|------|
| Status |   | o     | Macrobenthos | Diatom | Macrophytes | H365 | H358  | H274 | H7   | H1   |      | H365 |
|        |   |       |              |        |             |      |       |      | 10.3 | 10.4 |      |      |
|        | 5 | 0.31  |              | 0.03   | 0.41        | 0.76 | 8.132 | 8.16 | 9.40 | 1    | 8    | 2.35 |
|        | 2 | 0.68  |              | 0.61   | 0.5         | NaN  | 3.8   | 3.80 | 3.90 | 4.78 | 6.98 | 3.18 |
|        | 4 | 0.36  |              | 0.28   | 0.66        | 0.7  | 1.7   | 1.71 | 1.99 | 2.57 | 3.22 | 1.52 |
|        | 4 | 0.36  |              | 0.37   | 0.69        | 0.67 | 1.408 | 1.46 | 1.71 | 2.99 | 6.54 | 5.13 |
|        | 3 | 1     |              | 0.5    | 0.93        | 0.79 | 0.05  | 0.06 | 0.40 | 1.13 | 1.66 | 1.61 |
|        | 4 | 0.52  |              | 0.46   | 0.76        | 0.81 | 1.27  | 1.28 | 1.54 | 2.20 | 2.98 | 1.71 |
|        | 2 | 1     |              | 0.77   | 0.88        | 0.94 | 0.05  | 0.06 | 0.43 | 1.22 | 2.03 | 1.98 |
| NaN    |   | 0.43  | NaN          |        | NaN         | NaN  | 1.15  | 1.15 | 1.36 | 1.69 | 2.09 | 0.94 |
|        | 4 | 0.53  |              | 0.33   | 0.57        | 0.57 | 1.12  | 1.13 | 1.48 | 2.53 | 4.88 | 3.76 |
|        | 2 | 0.87  |              | 0.72   | 0.85        | 0.8  | 0.05  | 0.07 | 0.29 | 2.35 | 4.85 | 4.80 |
| NaN    |   | 0.48  | NaN          |        | NaN         | NaN  | 0.99  | 1.01 | 1.68 | 3.03 | 6.75 | 5.76 |
|        | 4 | 0.52  |              | 0.46   | 1.13        | 0.91 | 0.842 | 0.88 | 1.18 | 1.55 | 2.83 | 1.99 |
| NaN    |   | 0.9   | NaN          |        | NaN         | NaN  | 0.05  | 0.06 | 0.19 | 1.51 | 2.16 | 2.11 |
|        | 2 | 0.94  |              | 0.83   | 1.13        | 0.85 | 0.76  | 0.76 | 0.90 | 1.85 | 2.33 | 1.57 |
|        | 2 | 0.85  |              | 0.84   | 0.93        | NaN  | 0.718 | 0.74 | 0.93 | 1.59 | 2.78 | 2.06 |
|        | 2 | 0.83  |              | 0.85   | 0.88        | 0.95 | 0.718 | 0.74 | 0.93 | 1.59 | 2.78 | 2.06 |
|        | 2 | 0.86  |              | 0.87   | 0.99        | 0.83 | 0.68  | 0.69 | 0.97 | 1.31 | 1.86 | 1.18 |
|        | 4 | 0.91  |              | 0.35   | 0.67        | 0.71 | 0.05  | 0.05 | 0.27 | 0.72 | 1.53 | 1.48 |
|        | 3 | 0.41  |              | 0.5    | NaN         | NaN  | 0.05  | 0.06 | 0.23 | 1.48 | 5.00 | 4.95 |
|        | 4 | 0.64  |              | 0.31   | 0.46        | 0.79 | 0.05  | 0.06 | 0.33 | 0.90 | 2.11 | 2.06 |
|        | 4 | 0.58  |              | 0.38   | 0.93        | NaN  | 0.59  | 0.59 | 0.71 | 1.11 | 3.77 | 3.18 |
|        | 4 | 0.64  |              | 0.33   | 0.85        | 0.72 | 0.58  | 0.60 | 0.92 | 1.68 | 3.87 | 3.29 |
| NaN    |   | 0.9   |              | 1.1    | 1.06        | NaN  | 0.53  | 0.54 | 0.79 | 1.16 | 1.72 | 1.19 |
| NaN    |   | 0.94  | NaN          |        | NaN         | NaN  | 0.517 | 0.54 | 1.01 | 2.07 | 3.71 | 3.19 |
|        | 3 | 0.42  | NaN          |        | NaN         | NaN  | 0.507 | 0.58 | 0.86 | 1.18 | 3.18 | 2.67 |
|        | 4 | 0.25  |              | 0.46   | 0.81        | 0.54 | 0.507 | 0.58 | 0.86 | 1.18 | 3.18 | 2.67 |
|        | 4 | 0.28  |              | 0.29   | 0.88        | 0.73 | 0.05  | 0.06 | 0.60 | 1.08 | 1.94 | 1.89 |
|        | 2 | 0.7   |              | 0.47   | NaN         | NaN  | 0.471 | 0.49 | 0.74 | 1.36 | 4.09 | 3.62 |
|        | 3 | 0.36  | NaN          |        | NaN         | NaN  | 0.05  | 0.07 | 0.86 | 3.48 | 6.66 | 6.61 |
|        | 3 | 0.83  |              | 0.6    | 1.24        | 0.79 | 0.05  | 0.09 | 0.33 | 0.94 | 2.69 | 2.64 |
|        | 2 | 0.67  |              | 0.75   | 1.02        | 0.88 | 0.05  | 0.07 | 0.33 | 0.79 | 1.50 | 1.45 |
|        | 3 | 0.96  |              | 0.68   | 0.84        | 1.06 | 0.411 | 0.42 | 0.60 | 1.21 | 2.33 | 1.92 |
|        | 4 | 0.75  |              | 0.43   | 0.56        | 0.95 | 0.371 | 0.38 | 0.63 | 1.16 | 2.06 | 1.69 |
|        | 2 | 0.96  |              | 0.83   | 1.29        | NaN  | 0.05  | 0.23 | 0.43 | 0.95 | 1.40 | 1.35 |
|        | 4 | 0.19  | NaN          |        | NaN         | NaN  | 0.32  | 0.33 | 0.51 | 1.40 | 2.62 | 2.30 |
|        | 3 | 0.89  |              | 0.72   | 0.75        | 0.77 | 0.311 | 0.32 | 0.58 | 2.14 | 3.43 | 3.12 |
|        | 2 | 0.59  |              | 0.62   | 0.97        | NaN  | 0.267 | 0.35 | 0.61 | 0.88 | 3.20 | 2.93 |
|        | 3 | 0.95  |              | 0.62   | 0.87        | NaN  | 0.25  | 0.27 | 0.74 | 1.81 | 3.52 | 3.27 |
|        | 4 | 0.8   |              | 0.38   | 0.77        | 0.69 | 0.25  | 0.25 | 0.58 | 1.13 | 1.62 | 1.37 |
|        | 3 | 0.91  |              | 0.67   | 1.73        | NaN  | 0.23  | 0.23 | 0.29 | 0.49 | 0.90 | 0.67 |
|        | 3 | 0.75  |              | 0.57   | 1.08        | 0.86 | 0.05  | 0.06 | 0.32 | 0.49 | 0.55 | 0.50 |
| NaN    |   | 0.89  | NaN          |        | NaN         | NaN  | 0.05  | 0.06 | 0.32 | 0.49 | 0.55 | 0.50 |
|        | 2 | 1     |              | 0.85   | 0.82        | 0.9  | 0.05  | 0.06 | 0.32 | 0.49 | 0.55 | 0.50 |
|        | 3 | 0.42  |              | 0.68   | 0.66        | 0.68 | 0.05  | 0.06 | 0.32 | 0.49 | 0.55 | 0.50 |
|        | 3 | 0.84  |              | 0.58   | 0.86        | 0.76 | 0.05  | 0.06 | 0.32 | 0.49 | 0.55 | 0.50 |

|     |   |      |     |      |      |     |      |       |      |      |      |      |      |
|-----|---|------|-----|------|------|-----|------|-------|------|------|------|------|------|
| NaN |   | 0.76 | NaN |      | NaN  | NaN |      | 0.05  | 0.06 | 0.32 | 0.49 | 0.55 | 0.50 |
|     | 2 | 0.89 |     | 0.88 | 0.83 | NaN |      | 0.05  | 0.06 | 0.32 | 0.49 | 0.55 | 0.50 |
|     | 2 | 0.94 |     | 0.73 | 0.87 |     | 0.87 | 0.05  | 0.06 | 0.32 | 0.49 | 0.55 | 0.50 |
|     | 4 | 0.91 |     | 0.36 | 0.64 |     | 0.65 | 0.18  | 0.18 | 0.33 | 0.49 | 1.43 | 1.25 |
|     | 4 | 0.88 |     | 0.46 | 1.03 |     | 0.99 | 0.157 | 0.17 | 0.32 | 0.50 | 0.88 | 0.72 |
|     | 5 | 0.48 |     | 0.23 | 0.58 |     | 0.57 | 0.05  | 0.09 | 0.36 | 0.67 | 1.31 | 1.26 |
|     | 2 | 0.92 |     | 0.74 | 1.08 |     | 0.84 | 0.05  | 0.05 | 0.57 | 0.91 | 1.27 | 1.22 |
| NaN |   | 0.7  | NaN |      | NaN  | NaN |      | 0.05  | 0.05 | 0.36 | 0.89 | 2.27 | 2.22 |
|     | 3 | 0.72 |     | 0.7  | 0.66 | NaN |      | 0.09  | 0.10 | 0.27 | 0.56 | 0.79 | 0.70 |
| NaN |   | 0.76 | NaN |      | NaN  | NaN |      | 0.08  | 0.09 | 0.35 | 1.02 | 1.87 | 1.79 |
|     | 3 | 0.49 |     | 0.61 | 1.73 | NaN |      | 0.08  | 0.08 | 0.76 | 1.20 | 2.54 | 2.46 |
|     | 4 | 0.94 |     | 0.35 | 0.97 | NaN |      | 0.08  | 0.09 | 0.35 | 1.02 | 1.87 | 1.79 |
|     | 3 | 0.91 |     | 0.63 | 1.62 |     | 1.01 | 0.05  | 0.07 | 0.22 | 0.64 | 1.15 | 1.10 |
|     | 4 | 0.24 |     | 0.15 | NaN  | NaN |      | 0.05  | 0.09 | 0.32 | 0.57 | 0.70 | 0.65 |
|     | 3 | 0.97 |     | 0.82 | 1.1  |     | 0.94 | 0.05  | 0.11 | 0.55 | 0.83 | 1.43 | 1.38 |
|     | 4 | 0.54 |     | 0.41 | 0.41 |     | 0.69 | 0.05  | 0.07 | 0.34 | 0.72 | 1.42 | 1.37 |
| NaN |   | 0.8  | NaN |      | 1.16 | NaN |      | 0.05  | 0.05 | 0.29 | 0.61 | 0.98 | 0.93 |
| NaN |   | 0.97 |     | 0.36 | 0.99 | NaN |      | 0.05  | 0.06 | 0.22 | 0.34 | 0.52 | 0.47 |
| NaN |   | 0.58 | NaN |      | NaN  | NaN |      | 0.05  | 0.06 | 0.22 | 0.34 | 0.52 | 0.47 |
|     | 2 | 0.73 |     | 0.54 | 0.67 | NaN |      | 0.001 | 0.02 | 0.37 | 1.17 | 2.67 | 2.67 |
|     | 2 | 0.75 |     | 0.71 | 1.04 |     | 0.88 | 0.05  | 0.36 | 0.61 | 2.25 | 6.23 | 6.18 |
|     | 2 | 0.35 |     | 0.22 | 0.69 |     | 0    | 0.39  | 0.41 | 1.09 | 2.76 | 5.21 | 4.82 |
